# Supplementary material
Source: PubMed Central journal article supplement (PMC1691707)
Supplement: 15306363s01.pdf [file 15306363s01.pdf]

This is an electronic appendix to the paper by Isaac & Cowlishaw 2004 How species respond to multiple extinction threats. *Proc. R. Soc. Lond. B* **271**, 1135–1141. (DOI 10.1098/rspb.2004.2724.)

Electronic appendices are refereed with the text. However, no attempt is made to impose a uniform editorial style on the electronic appendices.

**Electronic Appendix A.**

- Responses to forestry;
- Responses to agriculture;
- Responses to hunting;
- Biological trait data.

*Responses to Forestry*

| Species                  | Nested median response | sample size (responses) | sample size (sites) | Mean (bootstrap) | SE (bootstrap) | Sources            |
|--------------------------|------------------------|-------------------------|---------------------|------------------|----------------|--------------------|
| Alouatta belzebul        | 0.19                   | 4                       | 3                   | 0.25             | 0.0034         | 1,2                |
| Alouatta palliata        | 1.92                   | 5                       | 1                   | 1.91             | 0.0135         | 3                  |
| Alouatta seniculus       | 1.78                   | 2                       | 2                   | 1.81             | 0.0357         | 4,5                |
| Aotus azarae             | 2.59                   | 1                       | 1                   | .                | .              | 4                  |
| Ateles belzebuth         | 0.00                   | 1                       | 1                   | .                | .              | 2                  |
| Ateles geoffroyi         | 0.14                   | 5                       | 1                   | 0.14             | 0.0013         | 3                  |
| Ateles paniscus          | 0.42                   | 2                       | 2                   | 0.42             | 0.0094         | 2,4                |
| Cacajao calvus           | 1.50                   | 1                       | 1                   | .                | .              | 5                  |
| Callicebus cupreus       | 4.02                   | 1                       | 1                   | .                | .              | 4                  |
| Callicebus torquatus     | 1.48                   | 1                       | 1                   | .                | .              | 4                  |
| Cebus albifrons          | 2.21                   | 1                       | 1                   | .                | .              | 4                  |
| Cebus apella             | 1.04                   | 6                       | 5                   | 1.05             | 0.0199         | 1,2                |
| Cebus capucinus          | 0.35                   | 5                       | 1                   | 0.35             | 0.0025         | 3                  |
| Cercocebus albigena      | 0.72                   | 10                      | 2                   | 0.60             | 0.0096         | 6,7,8,9,10         |
| Cercocebus torquatus     | 0.67                   | 1                       | 1                   | .                | .              | 11                 |
| Cercopithecus ascanius   | 1.53                   | 13                      | 2                   | 1.54             | 0.0170         | 6,7,8,9,12         |
| Cercopithecus cephus     | 1.63                   | 3                       | 1                   | 1.54             | 0.0179         | 10                 |
| Cercopithecus diana      | 0.67                   | 1                       | 1                   | .                | .              | 11                 |
| Cercopithecus lhoesti    | 0.11                   | 5                       | 1                   | 0.11             | 0.0027         | 6,7,9              |
| Cercopithecus mitis      | 3.88                   | 13                      | 2                   | 2.97             | 0.0612         | 6,7,8,9,12         |
| Cercopithecus nictitans  | 1.32                   | 3                       | 1                   | 1.10             | 0.0105         | 10                 |
| Cercopithecus petaurista | 0.85                   | 1                       | 1                   | .                | .              | 11                 |
| Cercopithecus pogonias   | 0.75                   | 3                       | 1                   | 0.68             | 0.0046         | 10                 |
| Cheirogaleus medius      | 3.22                   | 3                       | 1                   | 3.39             | 0.0637         | 13                 |
| Chiropotes albinasus     | 1.55                   | 1                       | 1                   | .                | .              | 2                  |
| Chiropotes satanas       | 0.15                   | 3                       | 2                   | 0.19             | 0.0047         | 1                  |
| Colobus badius           | 0.31                   | 9                       | 2                   | 0.41             | 0.0056         | 6,7,8,9,11,14      |
| Colobus guereza          | 2.63                   | 13                      | 2                   | 2.25             | 0.0144         | 6,7,8,9,12         |
| Colobus kirkii           | 0.19                   | 1                       | 1                   | .                | .              | 15                 |
| Colobus polykomos        | 0.94                   | 1                       | 1                   | .                | .              | 11                 |
| Colobus satanas          | 3.02                   | 3                       | 1                   | 2.94             | 0.0056         | 10                 |
| Galagoides demidoff      | 0.93                   | 1                       | 1                   | .                | .              | 16                 |
| Gorilla gorilla          | 1.00                   | 6                       | 3                   | 1.14             | 0.0096         | 10,17,18           |
| Hylobates agilis         | 0.09                   | 2                       | 2                   | 0.09             | 0.0020         | 19                 |
| Hylobates lar            | 1.06                   | 18                      | 7                   | 1.05             | 0.0026         | 20,21,22           |
| Hylobates muelleri       | 0.83                   | 8                       | 4                   | 0.85             | 0.0037         | 23,24,25,26        |
| Hylobates syndactylus    | 0.00                   | 1                       | 1                   | .                | .              | 19                 |
| Lagothrix lagothricha    | 0.22                   | 1                       | 1                   | .                | .              | 4                  |
| Lepilemur mustelinus     | 1.32                   | 3                       | 1                   | 1.32             | 0.0066         | 13                 |
| Macaca fascicularis      | 0.22                   | 6                       | 6                   | 0.31             | 0.0185         | 19,20,25           |
| Macaca nemestrina        | 0.75                   | 14                      | 9                   | 0.73             | 0.0164         | 19,20,21,23,26,27  |
| Macaca nigra             | 0.79                   | 1                       | 1                   | .                | .              | 28                 |
| Macaca silenus           | 0.79                   | 1                       | 1                   | .                | .              | 29                 |
| Mandrillus sphinx        | 0.60                   | 3                       | 1                   | 0.54             | 0.0052         | 10                 |
| Microcebus murinus       | 0.11                   | 2                       | 1                   | 0.11             | 0.0003         | 13                 |
| Nycticebus coucang       | 0.24                   | 3                       | 1                   | 0.44             | 0.0090         | 27                 |
| Pan troglodytes          | 0.41                   | 17                      | 6                   | 0.38             | 0.0024         | 6,7,10,12,17,18,30 |
| Papio anubis             | 0.79                   | 1                       | 1                   | .                | .              | 12                 |
| Perodicticus potto       | 0.10                   | 1                       | 1                   | .                | .              | 16                 |
| Pteropus fulvus          | 1.22                   | 3                       | 1                   | 0.95             | 0.0161         | 13                 |
| Phaner furcifer          | 1.01                   | 3                       | 1                   | 0.75             | 0.0167         | 13                 |
| Pithecia albicans        | 2.00                   | 1                       | 1                   | .                | .              | 4                  |
| Pongo pygmaeus           | 0.46                   | 10                      | 6                   | 0.59             | 0.0108         | 19,23,26,31,32,33  |
| Presbytis comata         | 0.64                   | 7                       | 4                   | 0.89             | 0.0188         | 19,23,26           |
| Presbytis cristata       | 0.10                   | 1                       | 1                   | .                | .              | 19                 |
| Presbytis melalophos     | 0.37                   | 19                      | 8                   | 0.55             | 0.0033         | 19,20,21,22        |

*Responses to Forestry*

| Species               | Nested median response | sample size (responses) | sample size (sites) | Mean (bootstrap) | SE (bootstrap) | Sources     |
|-----------------------|------------------------|-------------------------|---------------------|------------------|----------------|-------------|
| Presbytis obscura     | 0.23                   | 18                      | 7                   | 0.70             | 0.0136         | 20,21,22    |
| Presbytis rubicunda   | 0.76                   | 8                       | 4                   | 0.75             | 0.0062         | 23,24,25,26 |
| Procolobus verus      | 0.73                   | 1                       | 1                   | .                | .              | 11          |
| Propithecus verreauxi | 1.52                   | 3                       | 1                   | 1.10             | 0.0261         | 13          |
| Saguinus midas        | 0.74                   | 3                       | 2                   | 0.63             | 0.0093         | 1           |
| Saguinus mystax       | 1.13                   | 1                       | 1                   | .                | .              | 4           |
| Saimiri ustus         | 0.00                   | 1                       | 1                   | .                | .              | 2           |
| Saimiri vanzolinii    | 0.50                   | 1                       | 1                   | .                | .              | 5           |
| Tarsius pumilus       | 0.41                   | 1                       | 1                   | .                | .              | 34          |
| Varecia variegata     | 0.00                   | 1                       | 1                   | .                | .              | 35          |

## *Responses to Forestry*

1. Johns, A. D. (1986) (WWF-US, Washington DC).
2. Branch, L. C. (1983) *Primates* **24**, 424-431.
3. Sorensen, T. C. & Fedigan, L. M. (2000) *Biol. Cons.* **92**, 227-240.
4. Johns, A. D. (1991) in *Primate Responses to Environmental Change*, ed. Box, H. O. (Chapman & Hall, London), pp. 115-135.
5. Ayres, J. M. & Johns, A. D. (1987) *Oryx* **21**, 74-80.
6. Skorupa, J. P. (1986) in *Primates, the Road to Self-Sustaining Populations*, ed. Benirschke, K. (Springer-Verlag, New York), pp. 55-70.
7. Struhsaker, T. T. (1975) *The Red Colobus Monkey* (Chicago Univ. Press, Chicago).
8. Chapman, C. A., Balcomb, S. R., Gillespie, T. R., Skorupa, J. P. & Struhsaker, T. T. (2000) *Conservation Biology* **14**, 207-217.
9. Oates, J. F. (1977) in *Primate conservation*, eds. Ill, H. S. H. R. & Bournes, G. H. (Academic Press, New York), pp. 275-321.
10. White, L. J. T. (1994) *Journal of Animal Ecology* **63**, 499-512.
11. Martin, C. & Asibey, E. O. A. (1979) in *VIIIth International Primatology Society Conference*, Bangalore).
12. Plumptre, A. J. & Reynolds, V. (1994) *Journal of Applied Ecology* **31**, 631-641.
13. Ganzhorn, J. U. (1995) *Ecology* **76**, 2084-2096.
14. Chapman, C. A. & Chapman, L. J. (1999) *Primates* **40**, 215-231.
15. Silkiluwasha, F. (1981) *Afr. J. Ecol.* **19**, 187-194.
16. Weisenseel, K., Chapman, C. A. & Chapman, L. J. (1993) *Primates* **34**, 445-450.
17. Tutin, C. E. G. & Fernandez, M. (1984) *American Journal of Primatology* **6**, 313-336.
18. White, L. J. T. & Tutin, C. E. G. (2001) in *African Rain Forest Ecology and Conservation*, eds. Weber, B., White, L. J. T., Vedder, A. & Naughton-Treves, L. (Yale University Press, New Haven).
19. Wilson, C. C. & Wilson, W. L. (1976) *Yearbook of Physical Anthropology* **20**, 207-233.
20. Marsh, C. W. & Wilson, W. L. (1981) (Universiti Kebangsaan Malaysia, Kuala Lumpur).
21. Laidlaw, R. K. (1998) in *Conservation, Management and Development of Tropical Forest Resources*, eds. See, L.S., May, D.N., Gauld, I.D. & Bishop, J. (FRI Malaysia, Kuala Lumpur).
22. Grieser Johns, A. & Grieser Johns, B. (1995) *Oryx* **29**, 205-211.
23. Payne, J. B. & Davies, A. G. (1982) (WWF-Malaysia, Kuala Lumpur).
24. Wilson, W. L. & Johns, A. D. (1982) *Biol. Cons.* **24**, 205-218.
25. Wilson, C. C. & Wilson, W. L. (1975) *Folia Primatologica* **23**, 245-274.
26. Johns, A. D. (1992) *Philosophical Transactions of the Royal Society of London Series B-Biological Sciences* **335**, 437-442.
27. Johns, A. D. (1986) *Ecology* **67**, 684-694.
28. Rosenbaum, B., O'Brien, T. G., Kinnaird, M. & Supriatna, J. (1998) *American Journal of Primatology* **44**, 89-106.
29. Menon, S. & Poirier, F. E. (1996) *International Journal of Primatology* **17**, 969-985.
30. Hashimoto, C. (1995) *Primates* **36**, 477-488.
31. Russon, A. E., Erman, A. & Dennis, R. (2001) *Biological Conservation* **97**, 21-28.
32. Payne, J. B. (1987) *Primate Conservation* **8**, 92-103.
33. Rao, M. & van Schaik, C. P. (1997) *Tropical Biodiversity* **4**, 173-185.
34. Merker, S. & Muehlenberg, M. (2000) *Folia Primatologica* **71**, 426-428.
35. White, F. J., Overdorff, D. J., Balko, E. A. & Wright, P. C. (1995) *Folia Primatologica* **64**, 124-131.

*Responses to Agriculture*

| Species                  | Nested median response | sample size (responses) | sample size (sites) | Mean (bootstrap) | SE (bootstrap) | Sources  |
|--------------------------|------------------------|-------------------------|---------------------|------------------|----------------|----------|
| Alouatta belzebul        | 0.00                   | 1                       | 1                   | .                | .              | 1        |
| Alouatta seniculus       | 0.22                   | 1                       | 1                   | .                | .              | 2        |
| Aotus azarae             | 0.54                   | 1                       | 1                   | .                | .              | 2        |
| Ateles belzebuth         | 0.00                   | 1                       | 1                   | .                | .              | 1        |
| Ateles paniscus          | 0.00                   | 2                       | 2                   | 0.00             | 0.0000         | 1,2      |
| Callicebus cupreus       | 19.00                  | 1                       | 1                   | .                | .              | 2        |
| Callicebus torquatus     | 0.12                   | 1                       | 1                   | .                | .              | 2        |
| Cebus albifrons          | 0.37                   | 1                       | 1                   | .                | .              | 2        |
| Cebus apella             | 0.53                   | 2                       | 2                   | 0.53             | 0.0010         | 1,2      |
| Cercocebus albigena      | 0.70                   | 1                       | 1                   | .                | .              | 3        |
| Cercocebus torquatus     | 1.40                   | 2                       | 2                   | 1.38             | 0.0158         | 4,5      |
| Cercopithecus ascanius   | 0.93                   | 1                       | 1                   | .                | .              | 3        |
| Cercopithecus campbelli  | 2.82                   | 1                       | 1                   | .                | .              | 5        |
| Cercopithecus diana      | 0.21                   | 2                       | 2                   | 0.21             | 0.0041         | 4,5      |
| Cercopithecus erythrotis | 0.45                   | 2                       | 1                   | 0.45             | 0.0101         | 6        |
| Cercopithecus mitis      | 1.40                   | 1                       | 1                   | .                | .              | 3        |
| Cercopithecus nictitans  | 0.26                   | 2                       | 1                   | 0.25             | 0.0056         | 6        |
| Cercopithecus petaurista | 1.19                   | 2                       | 2                   | 1.18             | 0.0114         | 4,5      |
| Cercopithecus pogonias   | 0.42                   | 3                       | 2                   | 0.47             | 0.0062         | 3,6      |
| Chiropotes albinasus     | 0.00                   | 1                       | 1                   | .                | .              | 1        |
| Colobus angolensis       | 0.35                   | 1                       | 1                   | .                | .              | 3        |
| Colobus badius           | 0.19                   | 3                       | 3                   | 0.04             | 0.0073         | 3,4,5    |
| Colobus kirkii           | 0.86                   | 3                       | 1                   | 0.64             | 0.0142         | 7        |
| Colobus polykomos        | 0.31                   | 2                       | 2                   | 0.32             | 0.0061         | 4,5      |
| Gorilla gorilla          | 7.27                   | 2                       | 2                   | 7.39             | 0.1470         | 8,9      |
| Hylobates agilis         | 0.29                   | 2                       | 2                   | 0.28             | 0.0062         | 10       |
| Hylobates muelleri       | 0.87                   | 1                       | 1                   | .                | .              | 11       |
| Hylobates syndactylus    | 0.24                   | 2                       | 2                   | 0.25             | 0.0056         | 10       |
| Lagothrix lagothricha    | 0.00                   | 1                       | 1                   | .                | .              | 2        |
| Loris tardigradus        | 1.04                   | 1                       | 1                   | .                | .              | 12       |
| Macaca fascicularis      | 1.50                   | 2                       | 2                   | 1.50             | 0.0025         | 10       |
| Macaca nemestrina        | 0.36                   | 2                       | 2                   | 0.36             | 0.0080         | 10       |
| Macaca nigra             | 0.70                   | 1                       | 1                   | .                | .              | 13       |
| Mandrillus leucophaeus   | 6.67                   | 2                       | 1                   | 6.66             | 0.0387         | 6        |
| Pan troglodytes          | 2.75                   | 4                       | 3                   | 2.79             | 0.0659         | 5,6,8    |
| Pithecia albicans        | 0.10                   | 1                       | 1                   | .                | .              | 2        |
| Pongo pygmaeus           | 0.48                   | 3                       | 3                   | 0.63             | 0.0071         | 10,14,15 |
| Presbytis comata         | 0.00                   | 1                       | 1                   | .                | .              | 10       |
| Presbytis cristata       | 1.94                   | 2                       | 2                   | 1.95             | 0.0225         | 10       |
| Presbytis melalophos     | 0.37                   | 3                       | 3                   | 0.38             | 0.0062         | 10       |
| Procolobus verus         | 0.09                   | 1                       | 1                   | .                | .              | 4        |
| Saguinus mystax          | 0.29                   | 1                       | 1                   | .                | .              | 2        |
| Tarsius pumilus          | 1.15                   | 1                       | 1                   | .                | .              | 16       |

## ***Responses to Agriculture***

1. Branch, L. C. (1983) *Primates* **24**, 424-431.
2. Johns, A. D. (1991) in *Primate Responses to Environmental Change*, ed. Box, H. O. (Chapman & Hall, London), pp. 115-135.
3. Thomas, S. C. (1991) *Biotropica* **23**, 68-83.
4. Martin, C. & Asibey, E. O. A. (1979) in *VIIIth International Primatology Society Conference*, Bangalore).
5. Fimbel, C. (1994) *Biological Conservation* **70**, 277-286.
6. Gartlan, J. S. & Struhsaker, T. T. (1972) *J. Zool., Lond.* **168**, 221-266.
7. Silkiluwasha, F. (1981) *Afr. J. Ecol.* **19**, 187-194.
8. Tutin, C. E. G. & Fernandez, M. (1984) *American Journal of Primatology* **6**, 313-336.
9. Murnyak, D. F. (1981) *Biol. Cons.* **21**, 163-76.
10. Wilson, C. C. & Wilson, W. L. (1976) *Yearbook of Physical Anthropology* **20**, 207-233.
11. Bennett, E. L. & Dabahan, Z. (1995) in *Ecology, Conservation and Management of Southeast Asian Rainforests*, eds. Primack, R. B. & Lovejoy, T. E. (Yale Univ. Press, New Haven), pp. 66-86.
12. Singh, M., Kumar, M. A., Kumara, H. N. & Mohnot, S. M. (2000) *International Journal of Primatology* **21**, 721-730.
13. Rosenbaum, B., O'Brien, T. G., Kinnaird, M. & Supriatna, J. (1998) *American Journal of Primatology* **44**, 89-106.
14. Russon, A. E., Erman, A. & Dennis, R. (2001) *Biological Conservation* **97**, 21-28.
15. Rijksen, H. D. (1978) *A field study of Sumatran Orang-utans (Pongo pygmaeus abelii, Lesson 1827): Ecology, Behaviour and Conservation* (H. Veenan & Zonen, BV, Wageningen).
16. Merker, S. & Muehlenberg, M. (2000) *Folia Primatologica* **71**, 426-428.

*Responses to Hunting*

| Species                  | Nested median response | sample size (responses) | sample size (sites) | Mean (bootstrap) | SE (bootstrap) | Sources     |
|--------------------------|------------------------|-------------------------|---------------------|------------------|----------------|-------------|
| Alouatta belzebul        | 0.21                   | 3                       | 3                   | 0.52             | 0.0145         | 1,2         |
| Alouatta palliata        | 0.6275                 | 15                      | 4                   | 0.63             | 0.0053         | 2,3,4,5,6   |
| Alouatta seniculus       | 0.43                   | 10                      | 10                  | 0.45             | 0.0033         | 2,7,8,9     |
| Aotus azarae             | 0.7                    | 1                       | 1                   | .                | .              | 10          |
| Aotus trivirgatus        | 1.07                   | 1                       | 1                   | .                | .              | 9           |
| Ateles belzebuth         | 0                      | 1                       | 1                   | .                | .              | 9           |
| Ateles geoffroyi         | 0.29                   | 3                       | 2                   | 0.37             | 0.0103         | 4,5         |
| Ateles pansicus          | 0.17                   | 3                       | 3                   | 0.14             | 0.0021         | 6,7,8       |
| Cacajao calvus           | 1.17                   | 2                       | 2                   | 1.17             | 0.0048         | 6,7         |
| Callicebus brunneus      | 0.17                   | 1                       | 1                   | .                | .              | 10          |
| Callicebus cupreus       | 0.845                  | 2                       | 2                   | 0.85             | 0.0023         | 6,9         |
| Callicebus torquatus     | 0.98                   | 1                       | 1                   | .                | .              | 7           |
| Cebuella pygmaea         | 2.03                   | 1                       | 1                   | .                | .              | 7           |
| Cebus albifrons          | 0.72                   | 3                       | 3                   | 0.77             | 0.0053         | 6,7,9       |
| Cebus apella             | 0.545                  | 11                      | 6                   | 0.54             | 0.0034         | 6,7         |
| Cebus capucinus          | 0.71                   | 13                      | 2                   | 0.77             | 0.0063         | 3,4,5       |
| Cebus olivaceus          | 0.74                   | 1                       | 1                   | .                | .              | 8           |
| Cercocebus albigena      | 0.69                   | 7                       | 3                   | 0.54             | 0.0113         | 12,13,14    |
| Cercocebus torquatus     | 1.42                   | 1                       | 1                   | .                | .              | 15          |
| Cercopithecus ascanius   | 0.29                   | 3                       | 1                   | 0.49             | 0.0113         | 13          |
| Cercopithecus campbelli  | 1.5                    | 2                       | 1                   | 1.51             | 0.0146         | 16          |
| Cercopithecus cephus     | 0.645                  | 4                       | 2                   | 0.73             | 0.0042         | 12,14       |
| Cercopithecus diana      | 0.84                   | 3                       | 2                   | 0.78             | 0.0036         | 15,16       |
| Cercopithecus erythrotis | 0.19                   | 5                       | 1                   | 0.22             | 0.0028         | 17          |
| Cercopithecus mitis      | 1.47                   | 4                       | 2                   | 1.83             | 0.0172         | 13,18       |
| Cercopithecus nictitans  | 0.27                   | 10                      | 5                   | 0.34             | 0.0045         | 12,14,17,19 |
| Cercopithecus petaurista | 1.5                    | 2                       | 1                   | 1.50             | 0.0111         | 16          |
| Cercopithecus pogonias   | 0.73                   | 11                      | 4                   | 0.73             | 0.0062         | 12,13,14,17 |
| Cercopithecus preussi    | 0.28                   | 3                       | 1                   | 0.29             | 0.0062         | 17          |
| Chirotopes satanas       | 0.76                   | 1                       | 1                   | .                | .              | 1           |
| Colobus angolensis       | 0.49                   | 3                       | 1                   | 0.59             | 0.0074         | 13          |
| Colobus badius           | 0.31                   | 10                      | 4                   | 0.27             | 0.0114         | 13,15,16,17 |
| Colobus guereza          | 0.295                  | 4                       | 2                   | 0.29             | 0.0054         | 12,14       |
| Colobus polykomos        | 0.5625                 | 3                       | 2                   | 0.56             | 0.0012         | 15,16       |
| Colobus satanas          | 0.15                   | 5                       | 1                   | 0.14             | 0.0008         | 17          |
| Gorilla gorilla          | 0.3                    | 7                       | 5                   | 0.31             | 0.0037         | 12,14,20,21 |
| Hylobates muelleri       | 0.19                   | 2                       | 2                   | 0.19             | 0.0042         | 22          |
| Lagothrix lagotricha     | 0.11                   | 3                       | 3                   | 0.16             | 0.0037         | 6,7,9       |
| Macaca nigra             | 0.505                  | 2                       | 2                   | 0.51             | 0.0031         | 23,24       |
| Macaca radiata           | 0.29                   | 1                       | 1                   | .                | .              | 25          |
| Macaca tonkeana          | 0.08                   | 2                       | 1                   | 0.08             | 0.0004         | 26          |
| Mandrillus leucophaeus   | 0.2875                 | 4                       | 1                   | 0.27             | 0.0046         | 17          |
| Pan troglodytes          | 0.465                  | 6                       | 4                   | 0.44             | 0.0049         | 12,14,20    |
| Papio cynocephalus       | 0.52                   | 1                       | 1                   | .                | .              | 18          |
| Pithecia monachus        | 0.835                  | 2                       | 2                   | 0.83             | 0.0066         | 6,9         |
| Pithecia pithecia        | 1.43                   | 1                       | 1                   | .                | .              | 8           |
| Presbytis entellus       | 0.13                   | 1                       | 1                   | .                | .              | 25          |
| Procolobus verus         | 1.93                   | 1                       | 1                   | .                | .              | 15          |
| Saguinus fuscicollis     | 2.07                   | 1                       | 1                   | .                | .              | 7           |
| Saguinus midas           | 0.915                  | 2                       | 2                   | 0.92             | 0.0040         | 1,8         |
| Saguinus oedipus         | 5.5                    | 11                      | 1                   | 6.03             | 0.0306         | 3,4         |
| Saimiri boliviensis      | 0.1                    | 1                       | 1                   | .                | .              | 10          |
| Saimiri oerstedii        | 0.515                  | 2                       | 1                   | 0.51             | 0.0060         | 5           |
| Saimiri sciureus         | 0                      | 1                       | 1                   | .                | .              | 9           |

## *Responses to Hunting*

1. Lopes, M. A. & Ferrari, S. F. (2000) *Cons. Biol.* **14**, 1658-1665.
2. Peres, C. A. (1997) *Folia Primatol.* **68**, 199-222.
3. Wright, S. J., Zeballos, H., Dominguez, I., Gallardo, M. M., Moreno, M. C. & Ibanez, R. (2000) *Cons. Biol.* **14**, 227-239.
4. Glanz, W. E. (1991) in *Neotropical wildlife use and conservation*, eds. Robinson, J. G. & Redford, K. H. (Chicago Univ Press, Chicago), pp. 163-173.
5. Carillo, E., Wong, G. & Cuaron, D. (2000) *Cons. Biol.* **14**, 1580-1591.
6. Bodmer, R. E., Eisenberg, J. F. & Redford, K. H. (1997) *Cons. Biol.* **11**, 460-466.
7. Peres, C. A. (2000) in *Hunting for sustainability in tropical forests*, eds. Robinson, J. G. & Bennett, E. L. (Columbia Univ. Press, New York), pp. 31-56.
8. de Thoisy, B., Massemin, D. & Dewynter, M. (2000) *Neotropical Primates* **8**, 141-144.
9. Mena, P. V., Stallings, J. R., Regalado, J. B. & Cueva, R. L. (2000) in *Hunting for sustainability in tropical forests*, eds. Robinson, J. G. & Bennett, E. L. (Columbia Univ. Press, New York), pp. 57-78.
10. Emmons, L. H. (1984) *Biotropica* **16**, 210-222.
11. Hill, K., Padwe, J., Bejyvagi, C., Bepurangi, A., Jakugi, F., Tykuarangi, R. & Tykuarangi, T. (1997) *Cons. Biol.* **11**, 1339-1353.
12. Muchaal, P. K. & Ngandjui, G. (1999) *Cons. Biol.* **16**, 385-396.
13. Thomas, S. C. (1991) *Biotropica* **23**, 68-83.
14. Lahm, S. A. (1994) *Biodiversity & Conservation* **8**, 927-955.
15. Martin, C. (1991) *The rainforests of west Africa* (Birkhauser Verlag, Basel).
16. Davies, A. G. (1987) *Primate Conservation* **8**, 151-153.
17. Fa, J. (2000) in *Hunting for Sustainability in Tropical Forests*, eds. Robinson, J. & Bennett, E. (Columbia Univ. Press, New York), pp. 168-198.
18. Fitzgibbon, C. D., Mogaka, H. & Fanshawe, J. H. (1995) *Cons. Biol.* **9**, 1116-1126.
19. Lahm, S. A., Barnes, R. F. W., Beardsley, K. & Cervinka, P. (1998) *J. Trop. Ecol.* **14**, 629-643.
20. Tutin, C. E. G. & Fernandez, M. (1984) *American Journal of Primatology* **6**, 313-336.
21. Weber, A. W. & Vedder, A. (1983) *Biol. Cons.* **26**, 341-366.
22. Bennett, E. L. & Dabahan, Z. (1995) in *Ecology, Conservation and Management of Southeast Asian Rainforests*, eds. Primack, R. B. & Lovejoy, T. E. (Yale Univ. Press, New Haven), pp. 66-86.
23. Lee, R. J. (2000) in *Hunting for sustainability in tropical forests*, ed. Bennett, J. G. R. E. L. (Columbia Univ. Press, New York), pp. 455-472.
24. Rosenbaum, B., O'Brien, T. G., Kinnaird, M. & Supriatna, J. (1998) *American Journal of Primatology* **44**, 89-106.
25. Madhusudan, M. D. & Karanth, K. U. (2000) in *Hunting for sustainability in tropical forests*, eds. Robinson, J. G. & Bennett, E. L. (Columbia Univ. Press, New York), pp. 339-355.
26. Alvard, M. (2000) in *Hunting for sustainability in tropical forests*, eds. Robinson, J. G. & Bennett, E. L. (Columbia University Press, New York), pp. 214-230.



*Biological trait data*

| Species                  | Body mass (female, kg) | Gestation period (days) | Population density (indivs/km <sup>2</sup> ) | Home range (ha) | Group size | Frugivory (fruits and seeds as % total feeding time) | Terrestriality (% time at or below 5m ±2m, all behaviours) | Temperature range | Rainfall seasonality |
|--------------------------|------------------------|-------------------------|----------------------------------------------|-----------------|------------|------------------------------------------------------|------------------------------------------------------------|-------------------|----------------------|
| Alouatta belzebul        | 5.52 (1)               | . .                     | 13 (2)                                       | 10 (3)          | 5 (4)      | 59 (3)                                               | 0 (5)                                                      | 8.4               | 0.48 (6)             |
| Alouatta palliata        | 5.35 (1)               | 186 (4)                 | 48 (7)                                       | 35 (4)          | 13 (4)     | 13 (4)                                               | 0 (8)                                                      | 10                | 0.49 (9)             |
| Alouatta seniculus       | 5.21 (1)               | 191 (4)                 | 29 (7)                                       | 16 (4)          | 5 (4)      | 42 (4)                                               | 0 (10)                                                     | 8.1               | 0.39 (6)             |
| Aotus azarae             | 1.23 (1)               | 127 (4)                 | 24 (7)                                       | 3 (4)           | 3 (4)      | 70 (4)                                               | 0 (11)                                                     | 12                | 0.43 (12)            |
| Aotus trivirgatus        | 0.74 (1)               | 120 (4)                 | 63 (7)                                       | 10 (4)          | 4 (4)      | . .                                                  | . .                                                        | 9.3               | 0.39 (13)            |
| Ateles belzebuth         | 7.85 (1)               | 139 (14)                | 9 (7)                                        | 325 (4)         | 12 (4)     | 83 (4)                                               | . .                                                        | 8.1               | 0.39 (6)             |
| Ateles geoffroyi         | 7.29 (1)               | 229 (4)                 | 18 (7)                                       | 86 (4)          | 20 (4)     | 78 (15)                                              | 0 (16)                                                     | 10                | 0.49 (9)             |
| Ateles paniscus          | 8.44 (1)               | 225 (4)                 | 11 (7)                                       | 225 (4)         | 18 (4)     | 83 (4)                                               | 0 (10)                                                     | 8.1               | 0.39 (6)             |
| Cacajao calvus           | 2.88 (1)               | . .                     | . .                                          | 550 (4)         | 18 (4)     | 85 (4)                                               | . .                                                        | 8.1               | 0.39 (6)             |
| Callicebus brunneus      | 0.81 (1)               | . .                     | . .                                          | 4 (4)           | 3 (4)      | 47 (4)                                               | 18 (17)                                                    | 12                | 0.43 (12)            |
| Callicebus cupreus       | 1.12 (1)               | 130 (18)                | . .                                          | . .             | . .        | . .                                                  | . .                                                        | 10                | 0.33 (12)            |
| Callicebus torquatus     | 1.21 (1)               | . .                     | 17 (7)                                       | 12 (4)          | 4 (4)      | 67 (19)                                              | . .                                                        | 8.8               | 0.29 (6)             |
| Cebuella pygmaea         | 0.12 (1)               | 131 (4)                 | 390 (7)                                      | 0.3 (4)         | 6 (4)      | . .                                                  | 38 (20)                                                    | 13.1              | 0.41 (6)             |
| Cebus albifrons          | 2.29 (1)               | 162 (4)                 | 10 (7)                                       | 250 (4)         | 20 (4)     | 95 (4)                                               | 6 (21)                                                     | 8.8               | 0.29 (6)             |
| Cebus apella             | 2.52 (1)               | 154 (4)                 | 12 (7)                                       | 33 (4)          | 11 (4)     | 91 (4)                                               | 2 (21, 22)                                                 | 11.2              | 0.44 (6)             |
| Cebus capucinus          | 2.54 (1)               | 162 (4)                 | 12 (7)                                       | 59 (4)          | 15 (4)     | 65 (4)                                               | . .                                                        | 6.7               | 0.43 (9)             |
| Cercocebus albigena      | 6.02 (1)               | 187 (4)                 | 17 (23)                                      | 31 (4)          | 15 (4)     | 65 (24)                                              | 0 (25, 26)                                                 | 8.3               | 0.36 (27)            |
| Cercocebus torquatus     | 5.50 (1)               | 168 (4)                 | 14 (23)                                      | 247 (28)        | 37 (4)     | 86 (28)                                              | 70 (28, 29)                                                | 8.1               | 0.49 (27)            |
| Cercopithecus ascanius   | 2.92 (1)               | 149 (14)                | 61 (23)                                      | 39 (4)          | 21 (4)     | 62 (4)                                               | 12 (26)                                                    | 9.3               | 0.51 (27)            |
| Cercopithecus campbelli  | 2.70 (1)               | 180 (4)                 | 29 (23)                                      | 40 (4)          | 14 (4)     | 78 (4)                                               | 37 (30)                                                    | 5.8               | 0.5 (27)             |
| Cercopithecus cephus     | 2.88 (1)               | 168 (31)                | 17 (23)                                      | 32 (4)          | 20 (4)     | 74 (24)                                              | 10 (25)                                                    | 8.8               | 0.38 (27)            |
| Cercopithecus diana      | 3.90 (1)               | . .                     | 41 (23)                                      | 93 (4)          | 28 (4)     | 52 (30)                                              | 6 (30)                                                     | 9.2               | 0.38 (27)            |
| Cercopithecus erythrotis | 2.50 (32)              | . .                     | 25 (23)                                      | . .             | 17 (4)     | . .                                                  | 13 (25, 33)                                                | 7.6               | 0.39 (27)            |
| Cercopithecus lhoesti    | 3.45 (1)               | . .                     | . .                                          | 850 (4)         | 11 (4)     | 42 (34)                                              | . .                                                        | 10.5              | 0.35 (27)            |
| Cercopithecus mitis      | 4.25 (1)               | 140 (4)                 | 127 (23)                                     | 37 (4)          | 39 (4)     | 57 (34)                                              | 5 (26)                                                     | 14                | 0.68 (27)            |
| Cercopithecus nictitans  | 4.26 (1)               | 168 (31)                | 23 (23)                                      | 56 (4)          | 20 (4)     | 70 (24)                                              | 0 (25)                                                     | 8.7               | 0.4 (27)             |
| Cercopithecus petaurista | 2.90 (1)               | . .                     | 43 (23)                                      | . .             | 18 (4)     | 77 (30)                                              | 10 (30)                                                    | 5.8               | 0.5 (27)             |
| Cercopithecus pogonias   | 2.90 (1)               | 165 (4)                 | 14 (23)                                      | 78 (4)          | 14 (4)     | 78 (24)                                              | 2 (25, 26, 35)                                             | 9.7               | 0.38 (27)            |
| Cercopithecus preussi    | 4.50 (1)               | . .                     | . .                                          | . .             | 5 (4)      | 52 (36)                                              | 48 (25)                                                    | 7.6               | 0.39 (27)            |

*Biological trait data*

| Species                | Body mass (female, kg) | Gestation period (days) | Population density (indivs/km <sup>2</sup> ) | Home range (ha) | Group size | Frugivory (fruits and seeds as % total feeding time) | Terrestriality (% time at or below 5m ±2m, all behaviours) | Temperature range | Rainfall seasonality |
|------------------------|------------------------|-------------------------|----------------------------------------------|-----------------|------------|------------------------------------------------------|------------------------------------------------------------|-------------------|----------------------|
| Cheirogaleus medius    | 0.23 (1)               | 62 (4)                  | 173 (37)                                     | 4 (4)           | 3 (4)      | 79 (38)                                              | 42 (38)                                                    | 10.8              | 0.73 (27)            |
| Chiropotes albinasus   | 2.49 (1)               | 157 (4)                 | 7 (7)                                        | 100 (4)         | 14 (4)     | 90 (4)                                               | .                                                          | 11.2              | 0.44 (6)             |
| Chiropotes satanas     | 2.77 (1)               | 160 (4)                 | 9 (7)                                        | 163 (4)         | 20 (4)     | 96 (39)                                              | 0 (5)                                                      | 8.4               | 0.48 (6)             |
| Colobus angolensis     | 7.57 (1)               | .                       | 190 (40)                                     | 31 (41)         | 30 (4)     | 50 (42)                                              | 0 (26)                                                     | 12.6              | 0.38 (27)            |
| Colobus badius         | 7.47 (1)               | 198 (4)                 | 156 (23)                                     | 35 (4)          | 49 (4)     | 31 (43)                                              | 1 (26, 29, 44)                                             | 7.6               | 0.39 (27)            |
| Colobus guereza        | 8.60 (1)               | 170 (14)                | 176 (23)                                     | 16 (4)          | 9 (4)      | 15 (43)                                              | 9 (45)                                                     | 11.2              | 0.34 (27)            |
| Colobus kirkii         | 5.46 (1)               | .                       | 100 (40)                                     | 35 (4)          | 20 (4)     | 6 (4)                                                | .                                                          | 9.5               | 0.49 (27)            |
| Colobus polykomos      | 8.30 (1)               | 170 (4)                 | 39 (23)                                      | 20 (4)          | 13 (4)     | 35 (43)                                              | 1 (29)                                                     | 9.2               | 0.38 (27)            |
| Colobus satanas        | 7.42 (1)               | 195 (4)                 | 20 (23)                                      | 60 (4)          | 15 (4)     | 59 (43)                                              | 3 (25, 44)                                                 | 9.8               | 0.44 (27)            |
| Galagoides demidoff    | 0.06 (1)               | 113 (4)                 | 47 (23)                                      | 1 (4)           | 4 (4)      | 19 (4)                                               | 11 (46)                                                    | 8.7               | 0.4 (27)             |
| Gorilla gorilla        | 71.50 (1)              | 256 (4)                 | 0.7 (23)                                     | 1200 (4)        | 12 (4)     | 47 (24)                                              | .                                                          | 8                 | 0.45 (27)            |
| Hylobates agilis       | 5.82 (1)               | .                       | 17 (47)                                      | 27 (4)          | 4 (4)      | 58 (4)                                               | .                                                          | 6.7               | 0.32 (48)            |
| Hylobates lar          | 5.34 (1)               | 205 (4)                 | 6 (47)                                       | 33 (4)          | 5 (4)      | 50 (4)                                               | .                                                          | 8.3               | 0.57 (49)            |
| Hylobates muelleri     | 5.35 (1)               | .                       | 10 (47)                                      | 38 (4)          | 4 (4)      | 62 (4)                                               | 0 (50)                                                     | 10                | 0.28 (49)            |
| Hylobates syndactylus  | 10.70 (1)              | 213 (4)                 | 6 (47)                                       | 47 (4)          | 4 (4)      | 31 (4)                                               | .                                                          | 6.7               | 0.32 (48)            |
| Lagothrix lagothricha  | 7.09 (1)               | 223 (4)                 | 10 (7)                                       | 750 (4)         | 33 (4)     | 75 (4)                                               | 0 (22)                                                     | 8.1               | 0.39 (6)             |
| Lepilemur mustelinus   | 0.78 (1)               | 140 (4)                 | 186 (37)                                     | 2 (4)           | 2 (4)      | 30 (38)                                              | 13 (38)                                                    | 10.4              | 0.59 (27)            |
| Loris tardigradus      | 0.27 (1)               | 168 (4)                 | .                                            | 1 (4)           | 3 (4)      | 0 (51)                                               | .                                                          | 11.7              | 0.51 (49)            |
| Macaca fascicularis    | 3.59 (1)               | 165 (4)                 | 50 (40)                                      | 113 (4)         | 29 (4)     | 87 (52)                                              | 4 (50)                                                     | 7.8               | 0.5 (49)             |
| Macaca nemestrina      | 5.70 (1)               | 171 (4)                 | 15 (40)                                      | 445 (4)         | 28 (4)     | 74 (4)                                               | 72 (50)                                                    | 8.9               | 0.46 (49)            |
| Macaca nigra           | 5.47 (1)               | 185 (4)                 | .                                            | 217 (4)         | 47 (4)     | 66 (53)                                              | .                                                          | 7.8               | 0.45 (49)            |
| Macaca radiata         | 3.85 (1)               | 162 (4)                 | .                                            | 120 (4)         | 28 (4)     | 50 (4)                                               | .                                                          | 11.7              | 0.57 (49)            |
| Macaca silenus         | 6.10 (1)               | 174 (4)                 | .                                            | 131 (4)         | 17 (4)     | 67 (54)                                              | 2 (54)                                                     | 11.7              | 0.51 (49)            |
| Macaca tonkeanna       | 9.00 (1)               | 173 (55)                | .                                            | .               | .          | .                                                    | .                                                          | 7.8               | 0.45 (49)            |
| Mandrillus leucophaeus | 12.50 (1)              | 174 (4)                 | .                                            | 4500 (4)        | 97 (4)     | .                                                    | 62 (25)                                                    | 7.1               | 0.51 (27)            |
| Mandrillus sphinx      | 12.90 (1)              | 220 (4)                 | 7 (23)                                       | 3000 (4)        | 95 (4)     | 81 (24)                                              | 67 (56)                                                    | 8                 | 0.45 (27)            |
| Microcebus murinus     | 0.09 (1)               | 60 (4)                  | 42 (37)                                      | 2 (4)           | 3 (4)      | 53 (38)                                              | 89 (38)                                                    | 10.8              | 0.73 (27)            |
| Nycticebus coucang     | 0.83 (1)               | 191 (4)                 | 20 (57)                                      | .               | .          | 50 (4)                                               | .                                                          | 8.9               | 0.46 (49)            |
| Pan troglodytes        | 41.60 (1)              | 240 (4)                 | 2 (23)                                       | 3550 (4)        | 37 (4)     | 77 (24)                                              | 18 (25)                                                    | 5.8               | 0.43 (27)            |

*Biological trait data*

| Species               | Body mass (female, kg) | Gestation period (days) | Population density (indivs/km <sup>2</sup> ) | Home range (ha) | Group size | Frugivory (fruits and seeds as % total feeding time) | Terrestriality (% time at or below 5m ±2m, all behaviours) | Temperature range | Rainfall seasonality |
|-----------------------|------------------------|-------------------------|----------------------------------------------|-----------------|------------|------------------------------------------------------|------------------------------------------------------------|-------------------|----------------------|
| Papio anubis          | 12.50 (1)              | 180 (4)                 | 13 (23)                                      | 1968 (4)        | 50 (4)     | 32 (58)                                              | . .                                                        | 13.4 0.5 (27)     |                      |
| Papio cynocephalus    | 12.30 (1)              | 175 (4)                 | 6 (59)                                       | 1463 (4)        | 28 (4)     | 27 (58)                                              | . .                                                        | 11.2 0.58 (27)    |                      |
| Perodicticus potto    | 1.03 (1)               | 197 (4)                 | 5 (23)                                       | 8 (4)           | 2 (4)      | 65 (60)                                              | 85 (46)                                                    | 9 0.38 (27)       |                      |
| Petterus fulvus       | 2.15 (1)               | 120 (4)                 | 120 (37)                                     | 12 (4)          | 16 (4)     | 25 (61)                                              | 20 (62)                                                    | 10.4 0.59 (27)    |                      |
| Phaner furcifer       | 0.46 (1)               | . .                     | 96 (37)                                      | 4 (4)           | 3 (4)      | 17 (38)                                              | 16 (38)                                                    | 8.6 0.69 (27)     |                      |
| Pithecia albicans     | 2.80 (32)              | . .                     | 10 (22)                                      | 176 (4)         | 5 (4)      | 80 (4)                                               | 2 (22)                                                     | 8.1 0.39 (6)      |                      |
| Pithecia monachus     | 2.11 (1)               | . .                     | 22 (7)                                       | . .             | 3 (4)      | 93 (4)                                               | . .                                                        | 10 0.33 (12)      |                      |
| Pongo pygmaeus        | 35.70 (1)              | 244 (4)                 | 2 (40)                                       | 410 (4)         | 2 (4)      | 61 (63)                                              | 12 (50)                                                    | 9.4 0.41 (49)     |                      |
| Presbytis comata      | 6.71 (1)               | . .                     | 24 (64)                                      | 17 (4)          | 7 (4)      | 15 (4)                                               | 4 (50)                                                     | 6.7 0.45 (49)     |                      |
| Presbytis cristata    | 5.76 (1)               | . .                     | 63 (40)                                      | 13 (4)          | 22 (4)     | 32 (65)                                              | . .                                                        | 9.4 0.42 (49)     |                      |
| Presbytis entellus    | 9.89 (1)               | 184 (4)                 | 18 (64)                                      | 395 (4)         | 38 (4)     | 24 (4)                                               | . .                                                        | 12.8 0.77 (49)    |                      |
| Presbytis melalophos  | 6.47 (1)               | . .                     | 57 (64)                                      | 17 (4)          | 15 (4)     | 49 (4)                                               | . .                                                        | 9.4 0.41 (49)     |                      |
| Presbytis obscura     | 6.26 (1)               | 150 (4)                 | 72 (64)                                      | 33 (4)          | 10 (4)     | 35 (4)                                               | . .                                                        | 10.2 0.44 (48)    |                      |
| Presbytis rubicunda   | 6.17 (1)               | . .                     | 16 (64)                                      | 61 (4)          | 7 (4)      | 49 (4)                                               | . .                                                        | 6.7 0.3 (49)      |                      |
| Procolobus verus      | 4.20 (1)               | 165 (4)                 | 14 (23)                                      | 29 (4)          | 8 (4)      | 17 (4)                                               | 13 (29)                                                    | 6 0.52 (27)       |                      |
| Propithecus verreauxi | 3.62 (1)               | 143 (4)                 | 46 (37)                                      | 5 (4)           | 7 (4)      | 40 (61)                                              | 6 (66)                                                     | 10.8 0.73 (27)    |                      |
| Saguinus fuscicollis  | 0.36 (1)               | 149 (4)                 | 27 (7)                                       | 65 (4)          | 6 (4)      | 56 (4)                                               | 35 (22)                                                    | 13.1 0.41 (6)     |                      |
| Saguinus midas        | 0.58 (1)               | 154 (4)                 | 10 (7)                                       | 9 (4)           | 5 (4)      | 47 (67)                                              | 3 (20)                                                     | 8.4 0.48 (6)      |                      |
| Saguinus mystax       | 0.54 (1)               | 145 (4)                 | 24 (7)                                       | 30 (4)          | 5 (4)      | 51 (68)                                              | 12 (22)                                                    | 131 0.41 (6)      |                      |
| Saguinus oedipus      | 0.40 (1)               | 140 (4)                 | 51 (7)                                       | 9 (4)           | 7 (4)      | . .                                                  | . .                                                        | 6.9 0.46 (9)      |                      |
| Saimiri boliviensis   | 0.71 (1)               | 163 (4)                 | 46 (7)                                       | 126 (4)         | 11 (4)     | 18 (4)                                               | . .                                                        | 12 0.43 (12)      |                      |
| Saimiri oerstedii     | 0.68 (1)               | . .                     | 36 (69)                                      | 29 (4)          | 23 (4)     | . .                                                  | . .                                                        | 7.5 0.4 (9)       |                      |
| Saimiri sciureus      | 0.68 (1)               | 170 (4)                 | 62 (7)                                       | 98 (4)          | 32 (4)     | 12 (70)                                              | 8 (10)                                                     | 8.1 0.39 (6)      |                      |
| Saimiri ustus         | 0.80 (1)               | . .                     | . .                                          | . .             | . .        | . .                                                  | . .                                                        | 13 0.49 (6)       |                      |
| Saimiri vanzolinii    | 0.65 (1)               | . .                     | . .                                          | . .             | 25 (4)     | . .                                                  | . .                                                        | 10 0.33 (12)      |                      |
| Tarsius pumilus       | 0.11 (1)               | . .                     | . .                                          | 0.7 (4)         | . .        | 0 (4)                                                | . .                                                        | 7.2 0.64 (49)     |                      |
| Varecia variegata     | 3.52 (1)               | 96 (4)                  | 42 (71)                                      | 22 (4)          | 11 (4)     | 74 (72)                                              | 0 (62)                                                     | 7.5 0.5 (27)      |                      |

## Biological Trait data

1. Smith, R. J. & Jungers, W. L. (1997) *J. Hum. Evol.* **32**, 523-559.
2. Peres, C. A. (1997) *Folia Primatol.* **68**, 199-222.
3. Bonvicino, C. B. (1989) *Revista Nordestina de Biologia* **6**, 149-179.
4. Rowe, N. (1996) *The pictorial guide to living primates* (Pogonias Press, New York.).
5. Bobadilla, U. L. & Ferrari, S. F. (2000) *Am. J. Primatol.* **50**, 215-224.
6. Ratisbona, L. R. (1976) in *Climates of central and south America*, ed. Schwerdtfeger, W. (Elsevier, Amsterdam), pp. 219-294.
7. Robinson, J. G. & Redford, K. H. (1986) *Am. Nat* **128**, 665-680.
8. Mendel, F. (1976) *Folia Primatol.* **26**, 36-53.
9. Portig, H. (1976) in *Climates of central and south America*, ed. Schwerdtfeger, W. (Elsevier, Amsterdam), pp. 405-478.
10. Mittermeier, R. A. & van Roosmalen, M. G. M. (1981) *Folia Primatol.* **36**, 1-39.
11. Buchanan-Smith, H. M., Hardie, S. M., Caceres, C. & Prescott, M. J. (2000) *Int. J. Primatol.* **21**, 353-379.
12. Johnson, A. M. (1976) in *Climates of central and south America*, ed. Schwerdtfeger, W. (Elsevier, Amsterdam), pp. 147-218.
13. Snow, J. W. (1976) in *Climates of central and south America*, ed. Schwerdtfeger, W. (Elsevier, Amsterdam), pp. 295-404.
14. Hayssen, V., van Tienhoven, A. & van Tienhoven, A. (1993) *Asdell's patterns of mammalian reproduction* (Cornell University Press, Ithaca).
15. Chapman, C. A. (1987) *Folia Primatol.* **29**, 90-105.
16. Gonzalez-Kirchner, J. P. (1999) *Folia Primatol.* **70**, 55-60.
17. Ferrai, S. F., Iwanaga, S., M.R., M., Ramos, E. M., Ramos, P. C. S., Neto, E. H. D. & Coutinho, P. E. G. (2000) *Folia Primatol.* **41**, 229-234.
18. Jantschke, B., Welker, C. & Klaiber Schuh, A. (1995) *Folia Primatol.* **65**, 210-213.
19. Kinzey, W. G. (1992) *Am. J. Phys. Anthropol.* **88**, 499-514.
20. de la Torre, S., Snowdon, C. T. & Bejarano, M. (2000) *Biol. Cons.* **94**, 153-163.
21. van Schaik, C. P. & van Noordwijk, M. A. (1989) *Behav. Ecol. Sociobiol.* **24**, 265-276.
22. Peres, C. A. (1993) *J. Trop. Ecol.* **9**, 259-276.
23. Fa, J. E. & Purvis, A. (1997) *J. Anim. Ecol.* **66**, 98-112.
24. Tutin, C. E. G., Ham, R. M., White, L. J. T. & Harrison, M. J. S. (1997) *Am. J. Primatol.* **42**, 1-24.
25. Gartlan, J. S. & Struhsaker, T. T. (1972) *J. Zool., Lond.* **168**, 221-266.
26. Thomas, S. C. (1991) *Biotropica* **23**, 68-83.
27. Meteorological Office (1983) *Tables of temperature, relative humidity, precipitation and sunshine for the world. Vol. 3: Africa* (Her Majesty's Stationary Office, London).
28. Mitani, M. (1989) *Primates* **30**, 307-323.
29. McGraw, W. S. (1998) *Am. J. Phys. Anthropol.* **105**, 493-510.
30. McGraw, W. S. (2000) *Int. J. Primatol.* **21**, 157-182.
31. Butynski, T. M. e., pp. 284-322. Cambridge University Press: Cambridge. (1988) in *A primate radiation: evolutionary biology of the Africa guenons*, eds. Gautier-Hion, A., Bourliere, F., Gautier, J.-P. & Kingdon, J., Cambridge).
32. Silva, M. & Downing, J. A. (1995) *Handbook of Mammalian Body Masses* (CRC, Boca Raton).
33. Gonzalez-Kirchner, J. P. (1996) *Tropical Zoology* **9**, 297-304.
34. Kaplin, B. A. & Moermond, T. C. (2000) *Am. J. Primatol.* **50**, 227-246.
35. Gonzalez-Kirchner, J. P. (1996) *Folia Primatol.* **45**, 201-208.
36. Beeson, M., Tame, S., Keeming, E. & Lea, S. E. G. (1996) *J. Afr. Ecol.* **34**, 202-210.
37. Ganzhorn, J. U. (1992) *Oecologia* **91**, 540-547.
38. Hladik, C. M., Charles-Dominique, P. & Petter, J. J. (1980) in *Nocturnal Malagasy Primates: Ecology, Physiology and Behaviour*, eds. Charles-Dominique, P., Cooper, H. M., Hladik, C. M., Pages, E., Pariente, G. F., Petter-Rousseaux, A., Petter, J.-J. & Schilling, A. (Academic Press, New York).
39. Rosenberger, A. L. (1992) *Am. J. Phys. Anthropol.* **88**, 525-562.
40. Wolfheim, J. H. (1983) *Primates of the World: distribution, abundance and conservation* (University of Washington, Seattle).
41. Lowe, A. J. & Sturrock, G. A. (1998) *Folia Primatol.* **69**, 121-128.
42. Maisels, F., Gauthierhion, A. & Gautier, J. P. (1994) *International Journal of Primatology* **15**, 681-701.

## **Biological Trait data**

43. Oates, J. F. (1994) in *Colobine monkeys: their ecology, behaviour and evolution*, eds. Davies, A. G. & Oates, J. F. (Cambridge University Press, Cambridge), pp. 75-128.
44. Gonzalez-Kirchner, J. P. (1997) *Folia Zoologica* **46**, 97-104.
45. Struhsaker, T. T. (1978) in *Recent advances in primatology, vol. 1*, eds. Chivers, D. J. & Herbert, J. (Academic Press, London), pp. 225-248.
46. Charles-Dominique, P. (1977) *Ecology and behaviour of nocturnal prosimians* (Duckworth, London).
47. Cowlshaw, G. (1992) *Behaviour* **121**, 131-153.
48. Nieuwolt, S. (1981) in *Climates of southern and Western Asia*, eds. Takahasi, K. & Arakawa, H. (Elsevier, Amsterdam), pp. 1-66.
49. Meteorological Office (1966) *Tables of temperature, relative humidity and precipitation for the world. Part V: Asia* (Her Majesty's Stationary Office, London).
50. Rodman, P. S. (1978) in *The ecology of arboreal folivores*, ed. Montgomery, G. (Smithsonian Institution Press, Washington), pp. 465-478.
51. Nekaris, K. A. (1999) *Am. J. Phys. Anthropol.* **28**, S209.
52. Wheatley, B. P., Harya Putra, D. K. & Gonder, M. K. (1996) in *Evolution and Ecology of Macaque Societies*, eds. Fa, J. E. & Lindberg, D. G. (Cambridge University Press, Cambridge), pp. 182-206.
53. O'Brien, T. G. & Kinnaird, M. (1997) *Int. J. Primatol.* **18**, 321-351.
54. Kurup, G. U. & Kumar, A. (1993) *Int. J. Primatol.* **14**, 27-40.
55. Thierry, B., Heistermann, M., Aujard, F. & Hodges, J. K. (1996) *Am. J. Primatol.* **39**, 47-62.
56. Hoshino, J. (1985) *Primates* **26**, 248-273.
57. Bearder, S. K. (1987) in *Primate Societies*, eds. Smuts, B. B., Cheney, D. L., Seyfarth, R. M., Wrangham, R. W. & Struhsaker, T. T. (Chicago University Press, Chicago), pp. 11-24.
58. Whiten, A., Byrne, R. W., Barton, R. A., Waterman, P. G. & Henzi, S. P. (1991) *Phil. Trans. R. Soc. Lond. B* **334**, 187-197.
59. Anderson, C. M. (1981) *Int. J. Primatol.* **2**, 285-310.
60. Charles-Dominique, P. & Bearder, S. K. (1979), in *The Study of Promsimian Behavior*, eds. Doyle, G.A. & Martin, R.D.
61. Clutton-Brock, T.H., Harvey, P. H. (1977) in *Primate Ecology: Studies Of Feeding And Ranging Behaviour In Lemurs, Monkeys And Apes*, ed Clutton-Brock, T.H. (Academic Press: New York), pp. 557-584.
62. Vasey, N. (2000) *Am. J. Phys. Anthropol.* **112**, 411-431.
63. Galdikas, B. M. F. (1988) *International Journal of Primatology* **9**, 1-35.
64. Davies, A. G. (1994) in *Colobine monkeys: their ecology, behaviour and evolution*, eds. Davies, A. G. & Oates, J. F. (Cambridge University Press, Cambridge), pp. 285-310.
65. Kool, K. M. (1993) *International Journal of Primatology* **14**, 667-700.
66. Howarth, C. J., Wilson, J. M., Adamson, A. P., Wilson, M. E. & Boase, M. J. (1986) *Folia Primatol.* **47**.
67. Pack, K. S., Henry, O. & Sabatier, D. (1999) *Folia Primatol.* **70**, 1-7.
68. Garber, P. A. (1989) *American Journal of Primatology* **19**, 203-216.
69. Boinski, S. & Sirot, L. (1997) *Folia Primatol.* **68**, 181-193.
70. Robinson, J. G. & Janson, C. H. (1987) in *Primate Societies*, eds. Smuts, B. B., Cheney, D. L., Seyfarth, R. M., Wrangham, R. W. & Struhsaker, T. T. (Chicago University Press, Chicago), pp. 69-82.
71. Vasey, N. (1997) *Int. J. Primatol.* **18**, 207-216.
72. Rigamonti, M. M. (1993) in *Lemur social systems and their ecological basis*, eds. Kappeler, P. M. & Ganzhorn, J. U. (Plenum Press, New York), pp. 25-40.
